1  
2  
3  
4  
5  
6  
7  
8  
9  
10  
11  
12  
13  
14  
15  
16  
17  
18  
19  
20  
21  
22  
23  
24  
25

# **Exhaustive reconstruction of the CRISPR locus in *Mycobacterium tuberculosis* complex using short reads**

Christophe Guyeux<sup>1\*</sup>, Christophe Sola<sup>2</sup>, Guislaine Refrégier<sup>2</sup>

<sup>1</sup>FEMTO-ST Institute, UMR6174, CNRS, DISC Computer Department, Univ. Bourgogne France-Comté (UFBC), 16 route de Gray, 25000 Besancon, France

<sup>2</sup>Institute for Integrative Biology of the Cell (I2BC), CEA, CNRS, Univ. Paris-Sud, Université Paris-Saclay, 91198, Gif-sur-Yvette cedex, France

\*corresponding author: [christophe.guyeux@univ-fcomte.fr](mailto:christophe.guyeux@univ-fcomte.fr)

## 26 **Abstract**

27 Spoligotyping, a graphical partial display of the CRISPR locus that can be produced *in vitro* or *in*  
28 *silico*, is an important tool for analyzing the diversity of given *Mycobacterium tuberculosis* complex  
29 (MTC) isolates. As other CRISPR loci, this locus is made up of an alternation between direct  
30 repeats and spacers, and flanked by *cas* genes. Unveiling the genetic mechanisms of its evolution  
31 requires to have a fairly large amount of fully reconstructed loci among all MTC lineages.

32 In this article, we point out and resolve the problem of CRISPR reconstruction based on short read  
33 sequences. We first show that more than 1/3 of the currently assembled genomes available for this  
34 complex contain a CRISPR locus erroneously reconstructed, and errors can be very significant.  
35 Second, we present a new computational method allowing this locus to be reconstructed extensively  
36 and reliably *in silico* using short read sequencing runs. Third, using this method, we describe new  
37 structural characteristics of CRISPR locus by lineages. We show how both the classical  
38 experimental *in vitro* approach and the basic *in silico* spoligotyping provided by existing analytic  
39 tools miss a whole diversity of this locus in MTC, by not capturing duplications, spacer and direct  
40 repeats variants, and IS6110 insertion locations. This description is extended in a second article that  
41 presents general rules for the evolution of the CRISPR locus in MTC.

42 This work opens new perspectives for a larger exploration of CRISPR loci diversity and of  
43 mechanisms involved in its evolution and its functionality.

44

45

46

## 47 **1. Introduction**

48 The CRISPR locus of *Mycobacterium tuberculosis* complex (MTC) was first described in 1993 under  
49 the “Direct Repeat” locus designation [1]. It is made of 36 nucleotides-repeats interspaced by unique  
50 spacers of a mean of 37 bp (interval: 37bp-45bp). The repeats were soon themselves designated as  
51 Direct Repeats and abbreviated as such (DR). The two first sequenced isolates gave access to 43  
52 different spacers sequences. The detection of their presence/absence soon led to the development of  
53 the innovative “spoligotyping” method [2]. This method became very popular by its ease and digital  
54 format, and was indeed instrumental to decipher the global population structure of MTC [3]. More  
55 recently, Whole Genome Sequencing (WGS) studies confirmed that for many lineages and  
56 sublineages, the spoligotyping signature allows a correct taxonomical assignment [4], although some  
57 generic signatures remains either meaningless, imprecise or convergent, thus largely justifying the  
58 use of SNPs as preferred taxonomical markers either globally [5], or for Lineage 4 [6], for Lineage 1  
59 [7], or for Lineage 2 [8].

60 As in other species with functional CRISPRs, this locus is accompanied by a set of CRISPR  
61 associated (*cas*) genes. Their number and nature makes MTC CRISPR type fall into Type III-A group  
62 inside CRISPR-Cas taxonomy. It was recently shown to be active under its H37Rv form [9, 10]. Yet,  
63 part or the entire region is deleted in several MTC sublineages [11]. Whether the deletion of some of  
64 the *cas* genes in the CRISPR-Cas locus may promote genomic instability in some epidemic strains of  
65 MTC is another important issue [12].

66  
67 The genomic diversity of the CRISPR locus has been investigated in detail in a previous study on  
68 genomic diversity suggesting that spacer duplication, spacer variation, and IS6110 insertion sites  
69 could be found in the various phylogenetical lineages of MTC [13]. However, it concerned a  
70 collection of only 34 MTC strains and did not include any investigation on *cas* genes. Understanding  
71 evolutionary dynamics of this locus requires exploration of CRISPR-Cas region on an extended  
72 dataset. While the classic *in vitro* approach to spoligotyping is very easy to perform on large datasets,  
73 it only provides information on the presence or absence of a well-known list of spacers. This  
74 approach does not allow us to know for instance if the order of the spacers may change from one  
75 strain to another. Neither does it reveal if there has been a duplication of part of the locus. Finally, it  
76 does not provide information on the presence of insertions such as IS6110, nor on the existence of  
77 single nucleotide polymorphism (SNP) in its direct repeats or spacers. This masks potential  
78 functionally significant changes in the loci, and makes it impossible to carry out thorough  
79 evolutionary studies. New *in silico*-based approaches were developed to produce spoligotypes based  
80 on genome reads (SpolPred, spoTyping), however these methods similarly focused on the

81 presence/absence detection of the spacers, so that they have the same limitations as those pointed out  
82 above for *in vitro* method [14, 15].

83

84 The increased availability of whole genome sequencing of MTC is very promising, insofar as the  
85 reads covering multiple times all the places of the genomes, contain these SNPs, duplications, and  
86 possible insertions of the CRISPR locus. While, on the whole, it is easy to reconstruct most of a  
87 tuberculosis genome using traditional read assembly tools such as Velvet [16], this reconstruction is  
88 much more difficult for the CRISPR locus. Indeed, in this part of the genome, the same DR sequence  
89 is found between each pair of spacers. Since the size of a DR is not far from that of the k-mers usually  
90 used during assembly, there is a risk of wrong bifurcations when searching for a Eulerian path in the  
91 De Bruijn graph associated with this assembly. In this context, duplications are difficult to detect,  
92 especially when IS6110 insertions in the locus increase the risk of errors.

93

94 In this article, we present a new method to reconstruct CRISPR-Cas systems of MTC from raw  
95 Illumina (Illumina Inc, Sand Diego, CA) sequencing runs under a semi-automatized process. It is  
96 reliable and robust provided that the reads have sufficient coverage and sizes long enough to span  
97 more than one DR. This tool, based on the analyses carried out in [17, 18] particularizes the De  
98 Bruijn approach to the specific case of the CRISPR locus and is the main contribution of this article.  
99 We show its usefulness both by showing that it can reconstruct CRISPR of reliable reference  
100 genomes, and by presenting that mean quality of CRISPR-Cas reconstruction is poor in other  
101 assembled genomes available in the public databases. Then we present the high unexpected diversity  
102 of the CRISPR-Cas locus of MTC revealed by the exploration of a selection of 434 reads archives.  
103 The list of remarkable elements in this locus by MTC lineages is the subject of a separate publication  
104 [19].

## 105 2. Material and methods

### 106 a. Data collection

107 A first set of data concerns seven reference clinical isolates, for which both assembled  
108 genomes and short reads sequencing runs were available, downloaded from the NCBI  
109 website, and renown as reference strains (**Table 1**). This selection was made with the a  
110 priori that assembled genomes would be highly reliable. This concerns the following strains:  
111 CDC1551, Erdman, F11, H37Ra, W-148, and the *M. bovis* BCG str. Pasteur 1173P2 and  
112 Tokyo 172.

113 A second set of data concerns non-reference clinical isolates for which assembled genomes  
114 were available but not short reads sequencing runs.

115 The third set of data comes from a collection of sequence reads archives (NCBI-SRA and  
116 EMBL-SRA) that has been retrieved from some state-of-the-art articles to represent the  
117 diversity of MTC lineages [20, 21]. This collection was completed by SRA queries on the  
118 NCBI search engine, with taxid values of 33894 and 78331, corresponding respectively to  
119 *M. tuberculosis variant africanum* and *M. canettii* organisms.

120 The names of SRA run accessions (SRR) were compiled, then the actual WGS sequencing  
121 data were automatically downloaded via the fastq-dump command of the sra-tools  
122 package. This led to a database of about 3,500 runs in the form of reads. This database is  
123 meant to be a good representative of MTC diversity, both at the lineage level and  
124 regarding geographical origins.

125 A first selection on these runs was carried out, first of all concerning the sequencing  
126 technology, which should have been paired-end Illumina to avoid having to manage  
127 different formats in our scripts. We also recovered the size of the reads and the average  
128 coverage, and discarded all runs corresponding to weak covers (<50x) or with reads too  
129 small (minimum size of reads: 75 bp). This collection, once cleaned, was automatically  
130 annotated using the script described below, in order to attribute to each run its lineage, its  
131 spoligotypes "old format" (43 spacers) and "new format" (98 spacers), as well as its  
132 Spoligo-International-Type (SIT) as described in [22].

133

134

## 135 **b. Runs annotation**

136 As a first annotation of the short sequencing runs (WGS data), we assigned the  
137 lineage/sublineage, for each single nucleotide polymorphism (SNP) referenced in [23] for  
138 all lineages, in [6] for L4 sublineages, in [8] for L2 sublineages, and in [7] for L1  
139 sublineages. The annotation was made automatic by a script written in Python language  
140 that extracts, from its position in the reference genome H37Rv, a neighbourhood of 41  
141 nucleotides centered around each SNP. For each run and each lineage-defining SNP, this  
142 41 base pair sequence was then blasted on the read sequences (blastn, maximum e-value  
143 1e-5, from a local blast database calculated for each genome). At each blast output, we then  
144 counted the number of matches that contain the 41 bp version of H37Rv, and the number  
145 of matches that contain this pattern whose central nucleotide has been replaced by the SNP  
146 tabulated in [5-8]. If the number of mutated units was significantly higher than that of  
147 reference H37Rv, the line associated with this SNP was then added to the genome  
148 considered.

149 As a second annotation, we provided the *in silico-derived* old and new formats of  
150 spoligotypes based on the presence/absence of known spacers. To this end, we blasted each  
151 spacer on each of the read sequences (blastn, e-value < 1e-6), and we calculated the  
152 number of matches for each spacer (without looking at whether the sequences matched  
153 exactly, as spacers could have been mutated): if this number of matches exceeded 5% of  
154 the mean genome coverage, then we considered that the spacer could be added to the  
155 spoligotypes. At this level, the percentage has been preferred to a simple occurrence,  
156 because, for a certain number of runs, some spacers appeared in 2 or 3 reads when the  
157 number of occurrences of the other spacers exceeded, e.g., 70 – and this phenomenon  
158 tended to increase with coverage. These few spacers must obviously correspond either to a  
159 contamination, to a minor strain in a double infection, or less likely to similarities that  
160 appeared by chance due to reading errors, the latter increasing with the number of reads.  
161 As for the threshold value for the percentage, it was set in this way after various tests, and  
162 by comparing the spoligotypes produced with those known for reference strains. The SIT  
163 could then be deduced from a correspondence table derived from SITVIT2 [22].

164

## 165 **c. Assembled genomes annotation and analysis**

166 Slightly adapted script from what was set-up for runs were written to annotate these  
167 genomes in term of spoligotype profiles and lineage/sublineage assignation. MIRU-

168 Profiler was used to infer MIRU types from assembled genomes [24]. Resulting patterns  
169 were entered in TBminer to identify most likely MTC sublineage assignment according to  
170 MIRU-VNTR or spoligo profile or their combination [25].

171

## 172 **d. Listing of CRISPR-Cas remarkable sequences**

### 173 **i. Direct repeats and spacers**

174 In order to evaluate the presence of direct repeats (DRs) and spacers variants, we first  
175 needed the list of the reference ones. We thus compiled a first catalogue of the  
176 corresponding reference sequences that will be later inflated with variants. DR0 is the  
177 name given for reference DR [13], reference spacers  $k$  are referred to as  $esp_k$ .

178 We then looked for spacer variants, using regular expressions in randomly picked up runs  
179 from the sample #3 database. More specifically we searched in all the reads for patterns  
180 made up of : the last 12 nucleotides of the DR0 [13], followed by a variable sequence with  
181 a size between 10 to 70 nucleotides, followed by the first 12 nucleotides of the DR0  
182 (findall method of the python re module, patterns: DR0[-12:][[ATCG]{10,70})[DR0:12]  
183 and its reverse complement). The subsequences thus produced were then compared to the  
184 reference spacers as soon as they exceeded a number of occurrences fixed according to the  
185 coverage: if a given subpattern frequently appears between these two sections of DR0, and  
186 if it is not part of the known spacers, then it is determined whether it is a new spacer or a  
187 variant of a known spacer, in the following manner. The known spacer most similar to the  
188 detected subpattern is looked for, using a Needleman-Wunsch editing distance (compatible  
189 with substitution, indels, and gap insertion operations). If this similarity is greater than  
190 95%, the subpattern is considered to be a variant of the most similar spacer and is  
191 integrated as such in the catalog with a label of the following type  $esp_k(i)$  where  $i$  is the  
192 variant rank; otherwise, it is integrated in the catalog as a new spacer as  $esp_l$  where  
193  $l = \text{previous spacer number} + 1$ , see algorithm #1 in **Supplementary file 1**.

194

195 We then use this enhanced catalogue of spacer variants to find DR variants, in the same  
196 way as above. For each pair of spacers  $esp_k, esp_l$ , for  $k, l = 1 \dots 98$ , we look in the reads for  
197 subunits consisting of the last 12 nucleotides of  $esp_k$ , followed by 30 to 40 nucleotides,  
198 themselves followed by the first 12 nucleotides of  $esp_l$ . Again, reverse complement was

199 considered, to double the number of matches, and the possibility of a “\n” for reads spread  
200 over more than one line was also included. The new DRs thus obtained were then used in a  
201 second phase of discovery of spacer variants, as before, taking into account that the  
202 sequences bordering on spacers can be variants of the DR0.  
203

## 204 **ii. Other sequences of interest**

205 To this collection of subpatterns of interest to be discovered in the CRISPR loci, we added:

- 206 1) the beginning and end sequences of *IS6110* and its reverse complement (40 bp each  
207 time).
- 208 2) CRISPR approximate borders: sequences corresponding to Rv2816c (*cas2* gene of the  
209 *cas* locus) and Rv2813c, reputed to border the CRISPR locus [10].
- 210 3) CRISPR exact-flanking sequences: the reads including the end of the *cas2* gene have  
211 been extracted from a small collection of genomes from the database presenting  
212 spacer 1 in its “new spoligotype” to retrieve likely ancestral closest border to CRISPR  
213 locus. The consensus sequence located downstream has been reconstructed, then the  
214 reads including the latter were recovered. These included a DR0 followed by the  
215 spacer “new” number 1. After verification (blast), this CRISPR-flanking pattern was  
216 indeed found in a large set of genomes in our collection, so it was added as such to the  
217 catalog of patterns of interest. The same treatment was performed on genomes with  
218 spacer 68 to identify the end sequence between the latter spacer found in *MTC stricto*  
219 *sensu* (without *M. canettii*) and the Rv2813c gene. The corresponding pattern was  
220 also added to our catalog.

221

## 222 **e. Locus reconstruction**

### 223 **i. Contiguage**

224 For each run, the sequences of interest mentioned above were first blasted on all the reads  
225 (blastn, evaluated  $1e^{-7}$ ), in order to extract the small set of reads potentially covering the  
226 CRISPR locus. This small set of reads was then extended, where each read of size  $n$  was  
227 transformed into its  $n-k+1$   $k$ -mers, where  $k$  is equal to the integer part of  $4n/5$ . This step,  
228 inspired by a classical contiguage by De Bruijn approach [26], was carried out on the one



229 hand to have a good coverage of CRISPR in terms of k-mers, and this even if the original  
230 coverage was close to 50x, and on the other hand, in order not to definitively disqualify for  
231 the next steps a read with a possible reading error: in what follows, only its k-mers  
232 containing this error will be disqualified. Corresponding algorithm is available in  
233 **Supplementary file 1** (algorithm #2).

234 A sequence is thus randomly extracted from this set of k-mers potentially covering the  
235 CRISPR, serving as a starting point for the first contig, to which an initial score of 1 is  
236 associated. The k-mers such that their first k-1 nucleotides correspond exactly to the last k-  
237 1 nucleotides of the current contig are then obtained from the set of k-mers. It is then  
238 regarded if the majority of the latter have the same last nucleotide (i.e., in position k). If  
239 this is the case, this nucleotide is added to the current contig, the k-mers that have matched  
240 are removed, their number is added to the score of the current contig, and the progress  
241 continues to be made in the reconstruction of the locus with the next nucleotide. If this is  
242 not the case, we start again with the other side of the current contig, looking for k-mers  
243 whose last k-1 nucleotides correspond exactly to the first k-1 nucleotides of the current  
244 contiguous. And the latter is no longer extended from his tail, but from his head.

245 At a time when no consensus seems to be emerging for the new nucleotide to be added to  
246 the current contig, this latter is stored separately with its score, and the whole process is  
247 repeated from a new randomly extracted k-mer. As, at each iteration, at least one k-mer is  
248 removed from the original set, this process has an end, leading to a more or less long list of  
249 potential contigs, themselves more or less long.

250 The contigs are then manually processed by decreasing score, in order to reconstitute the  
251 CRISPR structure. To this end, the catalogue of sequences of interest (variants of spacers  
252 and DRs, sequences bordering the *IS6110*, and the start and end patterns of the locus) is  
253 iterated, in order to replace each nucleotide sub-sequence by its name using the replace  
254 method of the str class (python). The result of this post-processing of the previously  
255 obtained contigs is a reasonably sized character string, including patterns of the form  
256 \*spX(Y)\* for the variant Y of the spacer X, \*DRX\* for variant number X of the DR, as  
257 well as the words \*begin\_IS6110\*, \*end\_IS6110\*, \*begin\_IS6110c\*,  
258 \*end\_IS6110c\*, \*starting\_pattern\*, \*ending\_pattern\*, \*Rv2816c\*, and \*Rv2813c\*. This  
259 translation makes it easier to understand the contigs obtained, and makes it easy to detect a  
260 break in the order in which the spacers appear. It also allows to detect new variants that  
261 had not been detected until now, and to add them after naming to the database of

262 remarkable sequences. In the vast majority of the cases studied manually (but read  
263 exceptions in Duplication paragraph below), one to three contigs depending on the number  
264 of IS6110 insertions in the locus (those with the highest scores) were sufficient to  
265 reconstruct the entire locus. The extreme elements of said contigs always were either the  
266 sequences bordering the locus or a beginning or end of *IS6110(c)*.

## 267 **ii. Duplications resolution**

268 If the reconstruction, mentioned above, of the CRISPR locus makes it possible to highlight  
269 the tandem duplications of spacers, in the case of read files of size  $>75$  (leading to k-mers  
270  $>56$  bp, as in our selected WGS data), it nevertheless passes through possible duplications  
271 spread over several spacers. Let's suppose that we have a pattern of the form:  
272  $sp_k * sp_{k+1} * \dots * sp_l * sp_{k+1} * \dots * sp_l * sp_m$ . Then, once the contig is rebuilt to the end of  
273 spacer number  $l$  (and its DR), what comes next in the reads concerns both  $sp_{k+1}$  and  $sp_m$ :  
274 when these two sequences diverge, there is no longer a nucleotide consensus in the  
275 considered reads, and the expansion of the contig stops. In addition, the k-mers of the  
276 second repeated pattern were used in the expansion of this contig when it was at the first  
277 pattern, to a number of k-mers used and removed twice as large as expected, and to the  
278 impossibility of reading the repetition of the pattern.

279 At this stage, we can conclude that if the expansion of a contig has not stopped on an IS or  
280 a sequence bordering a CRISPR locus, and if the score of said contig is higher than  
281 expected, then there is a suspicion of large-scale duplication. To resolve this situation,  
282 post-treatment was added to the locus reconstruction pipeline: for each pair of spacers  $(k,l)$ ,  
283  $k,l=1\dots 98$ , we count the number of k-mers containing the last 12  $sp_k$  nucleotides, followed  
284 by any of the DR variants, followed by the first 12  $sp_l$  nucleotides. And couples whose  
285 number of matches is significant are displayed in lexicographic order. In this list, a pattern  
286 of the form  $sp_l * DRX * sp_m$ ,  $l \geq m$ , is proof of a duplication (in tandem when  $l=m$ ): after  $l$ ,  
287 we loop back to  $m < l$ . Of note, the successions of spacers involved in this duplication have  
288 a number of k-mers of the order of twice the successions of spacers located outside this  
289 duplication. And this doubling of the number of matches is a form of cross-validation of  
290 the duplication.

291 At this stage, we are therefore able to reconstruct the entire CRISPR locus from Illumina  
292 paired-end reads, provided that the coverage and size of the reads are reasonable, and this  
293 by being able to detect duplications, spacer and DR variants, and IS insertions. This

294 process is 95% automated, but it requires human intervention to finalize the assembly of  
295 the contigs. Once this locus has been reconstructed, the resulting spoligotypes (old and  
296 new) can be compared to spoligotypes based on presence/absence of spacer sequences. The  
297 algorithm is shown in **Supplementary File 2**.

298

#### 299 **f. Runs' additional selection**

300 A final point remains to be clarified at this stage, namely how the WGS runs here  
301 reconstructed were selected from our database of ~3,500 items. Indeed, although much of  
302 the reconstruction has been automated, the remaining 5% takes a little time to be properly  
303 carried out. Not wanting to waste time rebuilding loci where nothing has happened, in  
304 terms of insertion and duplication, we have taken part of the pipeline detailed above to  
305 make a selection of the runs of interest. These correspond to samples carrying duplications  
306 as well as samples carrying *IS6110* insertions.

307 For a given run, we focus on reads returning matches during a blast on sequences of  
308 interest (DR and spacers). This again is performed using k-mers derived from the reads as  
309 described above. Then, patterns of the shape of an end of spacer l, followed by a variant of  
310 DR, itself followed by a beginning of spacer m, where  $l \geq m$ , are looked for, as they are  
311 signs of duplication. Similarly, patterns of the form end of spacer k, followed by 0 to 36  
312 nucleotides, themselves followed by the beginning of *IS6110*, are looked for insertions in  
313 DRs. Finally, ends of DR variant, followed by a certain number of nucleotides, and then  
314 the beginning of *IS6110* for insertions, are searched for insertions in spacers (with all  
315 possible variations in terms of layout and reverse complement). Only runs with either of  
316 these conditions were further considered, as basis of knowledge for the numerical study  
317 detailed below.

318

### 319 **3. Results**

#### 320 **a. Evaluation of CRISPR locus reconstruction based on WGS data** 321 **of MTC reference strains**

322 We first reconstructed the CRISPR loci of the best MTC studied strains using corresponding  
323 sequencing runs. Although it should be noted that these 7 reference strains do not represent

324 the full MTC diversity since only four lineage 4 strains, two *M. bovis* BCG variants, and a  
325 single lineage 2 strains are concerned (**Table 1**). Still they concern three distant lineages  
326 among of the 7 lineages constituting MTC diversity.

327 Briefly, we blasted the subsequences that are part of CRISPR-Cas locus (referred to as  
328 “remarkable sequences”) against the sequence reads against. These reads were then used to  
329 build contigs by the De Bruijn approach [26]. During contig building, scores were calculated  
330 taking into account the number of reads involved. Contigs included exclusively remarkable  
331 sequences so that their structure could be coded as the list of the corresponding tags. Note  
332 that numbering of spacers are by default those from the 68-spacers format referred to as  
333 “new format” in this article [13]. The contigs were then processed manually in decreasing  
334 order of scores to resolve possible duplications and sequences flanking IS6110 insertions.  
335 The CRISPR structure was then coded as a binary pattern listing the presence or absence of  
336 the remarkable sequences in their order of appearance (spoligo-like profile) (**Table 1, lower**  
337 **part**).

338 For assembled genomes, we first identified the location of CRISPR locus using one of the  
339 remarkable sequences. The whole locus was then extracted and translated both as the list of  
340 actually present remarkable sequences, and as a binary pattern in a spoligotype-like format.  
341 The classical 43-spacers spoligotype was then extracted considering only the useful  
342 information (**Table 1 upper part**).

343 With both WGS-derived and assembled genomes-derived CRISPR features, we found the  
344 same spacer sequences alternating with the same DR sequences. This was true for DR  
345 variants found between spacers 25 and 26 (truncated version), between spacers 30 and 31,  
346 between spacers 64 and 65, 66 and 67, and between spacers 67 and 68 as described  
347 previously [13]. We also identified the expected IS6110 sequence in the DR between  
348 spacers 34 and 35. Last, we detected a duplication of spacer 35 and the adjacent DR (Direct  
349 Variant Repeat 35 or DVR35) as described by van Embden *et al*, but we always identified it  
350 at the 3’ end of DVR41, not DVR45 as described in text by these authors [13].

351 At the level of the spacer variants, a single discrepancy was identified around spacer 13 in  
352 H37Ra: in the assembled genome, there is a variant of the spacer with 10 more nucleotides,  
353 corresponding to tandem duplications of nucleotides, itself surrounded by two distinct  
354 variants of DR, one with a size 46 and the other with a size 39. These supposed DR  
355 inflations again correspond to tandem nucleotide duplications.

356 Altogether, the CRISPR-Cas locus reconstructed by our pipeline using WGS of reference

357 strains matches perfectly with the public assemblies. This validates our analytic pipeline to  
358 annotate and reconstruct CRISPR-Cas locus based on short-reads runs.

359

360

### 361 **b. CRISPR region in other MTC assembled genomes**

362 As performed for assembled genomes of reference MTC strains, we extracted the CRISPR-  
363 locus from an additional 185 assembled MTC genomes available in the Public databases  
364 (sample #2, **Figure 1**). First of all, it should be noted that this sample is far from being  
365 representative of the entire *Mycobacterium tuberculosis* complex. Indeed, we find in this set  
366 only 8 genomes of L1, two of L3, and neither L5 nor L7. Moreover, among the well  
367 represented lines, the diversity in terms of sublineages is not respected at all: we find only  
368 sublineage 2.2 in the 44 genomes of lineage 2 (including 40 of 2.2.1), when among the 110  
369 genomes of L4, we have 21 of L4.1.2.1, 16 of L4.3.2, 24 of L4.3.3, and for example no 4.6.  
370 We also noticed that 25 genomes out of the 187 genomes (~14%) were of really poor quality,  
371 accumulating multiple variations of spacers and DRs, at sizes varying greatly. For example,  
372 strain GG-77-11, line 4.3.2, has a mutant for spacers 19, 20, 21, 25, 32, 34 and 42. Other  
373 genomes with high frequency in spacer variants were EAI5\_NITR206, CAS\_NITR204. In  
374 these assembled genomes, we also occasionally found spacers 46 and 48 under various forms  
375 (variants) and places. We also noticed that of the 27 assembled genomes of 4.1 or 4.2 with the  
376 pair of spacers 41 and 42, 24 genomes failed to duplicate the 35 after the spacer 41. At the  
377 IS6110 level, all assembled genomes have an insertion upstream of spacer 35. However, only  
378 one other IS6110 copy was identified, in front of spacer 46 of strains of sublineage L2.2.1.

379 We then derived their 43-spacers spoligotype patterns. This profile was interpreted in terms  
380 of classification using TBminer, and robustness of this classification was further explored  
381 using MIRU-VNTR patterns derived from MIRU-Profler (**supplementary file 3**). All  
382 samples had sufficient information to enable their classification according to spoligotype  
383 patterns, and this classification was found convergent with MIRU-VNTR patterns for almost  
384 all of them (n=174, 94%). In parallel, we used our annotation procedure to classify all samples  
385 according to SNPs. Most of them exhibited several SNPs, and almost all sublineages SNPs  
386 confirmed lineage classification (samples carrying L1 SNPs carried L1-sublineages SNPs and  
387 not SNPs from sublineages from, let's say, L4 lineage). We then compared spoligotype-  
388 derived classification to SNPs-derived classification. Surprisingly, among the 65 non-L4

389 samples according to SNPs, 13 samples (belonging either to L1, L2 or L3) were classified as  
390 L4 according to their spoligotype and MIRU-VNTR patterns (**Table 2**). They indeed  
391 presented the typical sp43-50 (sp33-36 in the ancient format numbering) deletion  
392 characteristic of the L4 lineage that, until now, has never been described for strains of other  
393 lineages to our knowledge.  
394 In addition, among the 112 L4 samples, 54 samples had a typical MIRU-VNTR and  
395 spoligotype profile characteristic of H37Rv without belonging to L4.9, the H37Rv specific  
396 sublineage according to SNPs. They indeed carried the typical del sp30-31 (20-21 in ancient  
397 format) deletion characteristic of the H37Rv sublineage inside L4.9 (**Supplementary file 3**).  
398 Altogether we identified 67 assembled genomes (36%) with clear discrepancies between  
399 CRISPR and MIRU-VNTR information and SNPs, with many instances where reference  
400 genome sequences seem to have been borrowed and included in the assembly: a wide  
401 proportion of assembled genomes have likely erroneous CRISPR-loci, impeding their  
402 exploration to understand CRISPR diversity and evolutionary dynamics.

403

#### 404 **c. CRISPR evolutionary events in MTC**

405 We reconstructed the CRISPR-Cas locus of 434 strains representing the diversity of the  
406 MTC lineages and showing interesting features (**Figure 1**, sample #3). The global CRISPR  
407 profiles obtained were found to be consistent with SNPs-derived lineages and sublineages  
408 (del 43-50 found in L4 samples, etc., **Table 3, Supplementary file 4**). The resulting data  
409 are a pre-requisite to infer general principles of evolution in this part of the genome. As  
410 explained previously, these results and lessons will be the subject of a companion article  
411 [19]. In what follows, we will use these teachings to compare our method to the prevailing  
412 Velvet-based one [16]. To this end, we list the different types of events made detectable by  
413 the aforementioned method. They have been systematically observed in all lineages, in one  
414 or more lineages, or in a clearly defined sub-lineage.

415 Regarding DR diversity, almost all the time, there is the same direct repeats (DR) sequence  
416 between two given spacers. The DR0 version of the DR is largely predominant. The  
417 exceptions observed in the 7 references strains were confirmed:

- 418 • Regardless of the strain, the same variation between spacers 30 and 31 is always  
419 found (DR2). A second variant is systematically found between spacers 66 and 67  
420 (DR4), and a third between spacers 67 and 68 (DR5), and a fourth one between  
421 sp64 and 65 (DR6, **Table 4**).

- 422       ● All L1 samples, and only they, have an original DR variant between spacers 50 and  
423       51 (DR3), and those of sublineage L1.1.1.1 have another variation between spacers  
424       14 and 15 (DR1, **Table 4**).
- 425       ● There are also about 15 other DR mutants, but this is a one-time phenomenon. And  
426       if we except the DR between spacers 25 and 26, all DR variants have the same size,  
427       *i. e.* 36 base pairs. The DR truncated between spacers 25 and 26 is identical in all  
428       samples that have this pair of spacers.

429

430       At the spacer level, we have the following rules:

- 431       ● The strains of human and animal L6 lineage (*M. bovis*) all have a mutant of spacer  
432       4, when present.
- 433       ● The L7 ones all have a variant of spacer 6.
- 434       ● All strains of lineage 1.1.1.1 have a spacer 38 variant.

435

436       Concerning duplications, the following points should be noted: 1) a large duplication  
437       between spacers 20 and 21 in lineages 1.1.1.7 and 1.1.1.8; 2) a large tandem duplication of  
438       spacer 29 in lineage 1.1.3, as well as spacers 5 and 21 in L3; 3) some of 1.2.1.2 strains  
439       have a large duplication of 25 spacers between 57 and 58; 4) there is duplication of spacer  
440       35 everywhere between spacers 41 and 42, with the notable exception of sublineages 4.3 to  
441       4.9 (**Supplementary file 4**).

442       Finally, as expected, we always found an IS6110 insertion sequence between spacers 34  
443       and 35. Other IS6110 insertions were identified in DRs or in spacers, in the sense or  
444       antisense direction (**Supplementary file 4**).

## 445 4. Discussion

446 We set up a semi-automatic pipeline to reconstruct CRISPR-Cas locus from MTC short  
447 reads sequencing runs. We first discuss the robustness of this pipeline and then comment  
448 on the problems at stake when trying to reconstruct CRISPR locus using standard assembly  
449 pipelines.

### 450 a) Robustness of the pipeline reconstructing CRISPR loci

451 The pipeline proposed is based on a De Bruijn approach and builds contig based on the  
452 consensus extension of k-mers. The selectivity of the consensus is cross-validated by the  
453 manual exploration of the coverage of the different spacers and DR.

454 CRISPR loci extracted from MTC reference genomes mainly deriving from Sanger  
455 sequencing, and the loci we reconstructed based on short-read sequencing runs of the same  
456 samples proved almost 100% concordant. The single discrepancy occurred for H37Ra that  
457 exhibited oligonucleotide repetitions in one single spacer and adjacent DR, repetitions that  
458 are absent in the highly related H37Rv genome. Two reasons may account for this  
459 discrepancy. The first possibility is that the two H37Ra strains actually handled by the two  
460 methods were not the same, and rare mutation occurred in the subclone that was used to  
461 produce the assembled genome sequence. No such mutation, leading to increased size of a  
462 spacer and its adjacent DR, was however observed in the 434 runs explored in the  
463 subsequent work, making this possibility quite unlikely. The second possibility is that there  
464 was an error during the assembly or the Sanger sequencing used to reconstruct this locus.

465 The robustness of our pipeline is further supported by the compatibility between SNPs  
466 subclustering and clustering derived from specific mutations in the CRISPR-Cas locus,  
467 whether they concerned *IS6110* insertions, spacer or DR variations, of duplications. For  
468 instance, we observed the sp43-50 deletions in all L4 samples, we observed an *IS6110*  
469 insertion downstream of spacer 41 in all 4.1.2.1 samples, a variant in sp4 in all L6 samples,  
470 a tandem duplication of DVR5 was observed in all L2 and L3 samples still harbouring this  
471 region of the CRISPR (L2.1, most L3) etc. (**Supplementary file 4**). We also could confirm  
472 all specificities identified in the pioneer work using targeted Sanger sequencing such as  
473 DVR35 duplication for all samples outside L4 and most samples of L4, DR variants  
474 between sp30-31, sp 50-51, sp64-65, sp66-67 and 67-68 [13].

475 This reconstruction results in a high level of additional information as compared to existing



476 methods exploring MTC CRISPR diversity: both *in vitro* and *in silico* spoligotyping only  
477 deal with the presence or absence of specific spacers, with methods tolerating non-fully  
478 concordant sequences. As a result, all the information of spacer and DR variants, DVR  
479 duplications, IS6110 insertions is lost.

480

481 **b) On the use of standard assembly methods for CRISPR reconstruction and resulting**  
482 **assembled genomes in Public databases**

483 The systematic study of the CRISPR loci of the assembled genomes deposited in public  
484 databases first showed that, in the approximately 200 genomes currently available, most  
485 seem to have a well reconstructed CRISPR, especially the reference samples that likely  
486 benefited from partial Sanger sequencing. Conversely, another relatively large proportion  
487 of these genomes (more than 1/3) have a clearly problematic locus, not trustworthy at all.  
488 This does not mean that there is no benefit in sharing such data, which can be informative  
489 for the rest of the genome. However, the problem is that it is difficult to know *a priori*  
490 whether, for a given genome, the CRISPR locus is, or is not, trustworthy. The reasons for  
491 this average low quality of CRISPR information is first its genetic complexity, and second  
492 the difficulty to deal with this complexity when explored using short reads sequences.  
493 Obviously, a number of studies have failed in reconstructing this locus using short reads  
494 sequencing. The difficulty of such a reconstruction, and the errors that result from it, have  
495 their source in several causes, some of which have already been introduced previously.

496 First of all, the CRISPR locus is by nature a very difficult area to assemble, at least  
497 automatically. Indeed, the De Bruijn approaches look for an Eulerian path in the graph  
498 whose vertices are the k-mers, and for which there is an edge between two vertices if, and  
499 only if a suffix of one is a prefix of the other. This locus contains multiple copies of DRs,  
500 IS6110 insertions, spacers that sometimes share similarities (the beginning of spacer 33 is  
501 the end of spacer 36, for example). In addition, we identified common DVR duplications  
502 and even large scale duplications, especially in Lineage 1 (Refrégier et al, in preparation).  
503 All these events lead to possible bifurcations in the graph.

504 In addition, the assembly is usually done by Velvet [8], which by default has a maximum  
505 k-mer size of 49. In the best case scenario where this size has been set to its preconfigured  
506 maximum, knowing that a DR is size 36, this leaves only 13 bp of overlap to be shared  
507 between the two spacers, upstream and downstream, which multiplies the incorrect

508 bifurcations in the graph. Increasing this limit value requires recompiling Velvet from its  
509 sources, which obviously only a few or no people who submitted their assembled *M.*  
510 *tuberculosis* genomes have done.

511 Finally, the assembly is often reference-guided. In that case, assembly uses mainly H37Rv,  
512 a recent well-studied L4 isolate. However, this strain is not really representative of the  
513 diversity of the locus: it has no duplication, and only the ancestral IS copy upstream of  
514 spacer 35. When mapping reads to this reference, samples containing spacers not present in  
515 H37Rv (such as sp43-50) are likely to be discarded or misplaced. This is why a majority of  
516 the spoligotypes derived from the assembled genomes available on the NCBI appeared to  
517 be L4- related, while at the SNP level, the lineages were a little bit more diverse: there  
518 were obviously holes in the CRISPR locus, which is therefore not trustworthy.

519

520

## 521 **5. Conclusion**

522 In this article, we have explained why MTC CRISPR locus should not be assembled using  
523 standard tools and we have begun to reveal the unexpected diversity it contains. This was  
524 made possible thanks to a semi-automatic method that allows, for genomes with a  
525 reasonable coverage and read size, to reconstruct CRISPR-Cas locus in a reliable, fast and  
526 robust way. It reveals duplications of various length, variants of spacers and DRs, and  
527 insertions of *IS6110* sequences, *i.e.* a full range of evolutionary events that may be found  
528 in other CRISPR loci.

529 In a companion article, we describe the high diversity of MTC CRISPR locus unveiled by  
530 our new method, we establish a list of notable elements by lineage, and infer MTC  
531 CRISPR various mechanisms of evolution. Among our objectives is the transformation of  
532 our tool into a professional quality software, so that the whole community can benefit from  
533 it. We also wish to study each lineage separately and in depth, on large sets of  
534 representative genomes, in order to reveal the fine evolutionary dynamics of the CRISPR-  
535 cas locus.

536

537

538

## 539 List of Figures and Supplementary Material

540

541 **Figure 1:** Diagram showing the different dataset of our study and the process of MTC

542 CRISPR Locus reconstruction

543

544

## 545 List of Tables

546

547 **Table 1 – CRISPR-Cas and general features of strains used as references for CRISPR**  
548 **reconstruction pipeline**

549

550 **Table 2 – Spoligotype and MIRU-VNTR profiles of Public assembled genomes with**  
551 **discrepancies between SNP-based and spoligo-derived classification**

552

553 **Table 3 – CRISPR-Cas locus profile reconstructed from pubic WGS runs and representative of**  
554 **MTC diversity**

555

556 **Table 4 – DR and spacer variants for the representative set of MTC diversity**

557

558

559

## 560 References

- 561 1. Groenen, P.M., et al., *Nature of DNA polymorphism in the direct repeat cluster of*  
562 *Mycobacterium tuberculosis; application for strain differentiation by a novel typing*  
563 *method.* Mol Microbiol, 1993. **10**(5): p. 1057-65.
- 564 2. Kamerbeek, J., et al., *Simultaneous detection and strain differentiation of*  
565 *Mycobacterium tuberculosis for diagnosis and epidemiology.* J Clin Microbiol, 1997.  
566 **35**(4): p. 907-14.
- 567 3. Brudey, K., et al., *Mycobacterium tuberculosis complex genetic diversity : mining the*  
568 *fourth international spoligotyping database (SpolDB4) for classification, Population*  
569 *Genetics, and Epidemiology.* BMC Microbiol., 2006. **6**(6): p. 23.
- 570 4. Kato-Maeda, M., et al., *Strain classification of Mycobacterium tuberculosis:*  
571 *congruence between large sequence polymorphisms and spoligotypes.* Int J Tuberc  
572 Lung Dis, 2011. **15**(1): p. 131-3.
- 573 5. Coll, F., et al., *PolyTB: A genomic variation map for Mycobacterium tuberculosis.*  
574 *Tuberculosis (Edinb)*, 2014. **94**(3):**346-54**(3): p. 346-354.
- 575 6. Stucki, D., et al., *Mycobacterium tuberculosis lineage 4 comprises globally distributed*  
576 *and geographically restricted sublineages.* Nat Genet, 2016. **48**(12): p. 1535-1543.
- 577 7. Palittapongarnpim, P., et al., *Evidence for Host-Bacterial Co-evolution via Genome*  
578 *Sequence Analysis of 480 Thai Mycobacterium tuberculosis Lineage 1 Isolates.* Sci  
579 Rep, 2018. **8**(1): p. 11597.
- 580 8. Shitikov, E., et al., *Evolutionary pathway analysis and unified classification of East*  
581 *Asian lineage of Mycobacterium tuberculosis.* Sci Rep, 2017. **7**(1): p. 9227.
- 582 9. Makarova, K.S., Y.I. Wolf, and E.V. Koonin, *Classification and Nomenclature of*  
583 *CRISPR-Cas Systems: Where from Here?* CRISPR J, 2018. **1**(5): p. 325-336.
- 584 10. Wei, W., et al., *Mycobacterium tuberculosis type III-A CRISPR/Cas system crRNA*  
585 *and its maturation have atypical features.* FASEB J, 2019. **33**(1): p. 1496-1509.
- 586 11. Tsolaki, A.G., et al., *Functional and evolutionary genomics of Mycobacterium*

- 587 *tuberculosis: Insights from genomic deletions in 100 strains*. Proc Natl Acad Sci U S  
588 A, 2004. **101**(14): p. 4865-70. Epub 2004 Mar 15.
- 589 12. Freidlin, P.J., et al., *Structure and variation of CRISPR and CRISPR-flanking regions*  
590 *in deleted-direct repeat region Mycobacterium tuberculosis complex strains*. BMC  
591 Genomics, 2017. **18**(1): p. 168.
- 592 13. van Embden, J.D.A., et al., *Genetic variation and evolutionary origin of the Direct*  
593 *repeat locus of Mycobacterium tuberculosis complex bacteria*. J. Bacteriol., 2000. **182**:  
594 p. 2393-2401.
- 595 14. Coll, F., et al., *SpolPred: rapid and accurate prediction of Mycobacterium*  
596 *tuberculosis spoligotypes from short genomic sequences*. Bioinformatics, 2012.  
597 **28**(22): p. 2991-3.
- 598 15. Xia, E., Y.Y. Teo, and R.T. Ong, *SpoTyping: fast and accurate in silico*  
599 *Mycobacterium spoligotyping from sequence reads*. Genome Med, 2016. **8**(1): p. 19.
- 600 16. Zerbino, D.R. and E. Birney, *Velvet: algorithms for de novo short read assembly using*  
601 *de Bruijn graphs*. Genome Res, 2008. **18**(5): p. 821-9.
- 602 17. Guyeux, C., et al., *On the reconstruction of the ancestral bacterial genomes in genus*  
603 *Mycobacterium and Brucella*. BMC Syst Biol, 2018. **12**(Suppl 5): p. 100.
- 604 18. Guyeux, C., et al., *Evaluation of chloroplast genome annotation tools and application*  
605 *to analysis of the evolution of coffee species*. PLoS One, 2019. **14**(6): p. e0216347.
- 606 19. Refrégier, G., C. Sola, and C. Guyeux, *Unexpected diversity of CRISPR unveils some*  
607 *evolutionary patterns of repeated sequences in Mycobacterium tuberculosis*. J.  
608 Bacteriol, 2019. **in preparation**.
- 609 20. Brynildsrud, O.B., et al., *Global expansion of Mycobacterium tuberculosis lineage 4*  
610 *shaped by colonial migration and local adaptation*. Sci Adv, 2018. **4**(10): p. eaat5869.
- 611 21. Roychowdhury, T., S. Mandal, and A. Bhattacharya, *Analysis of IS6110 insertion sites*  
612 *provide a glimpse into genome evolution of Mycobacterium tuberculosis*. Sci Rep,  
613 2015. **5**: p. 12567.
- 614 22. Couvin, D., et al., *Macro-geographical specificities of the prevailing tuberculosis*  
615 *epidemic as seen through SITVIT2, an updated version of the Mycobacterium*  
616 *tuberculosis genotyping database*. Infect Genet Evol, 2018.
- 617 23. Coll, F., et al., *A robust SNP barcode for typing Mycobacterium tuberculosis complex*  
618 *strains*. Nat Commun, 2014. **5**: p. 4812.
- 619 24. Rajwani, R., S. Shehzad, and G.K.H. Siu, *MIRU-profiler: a rapid tool for*  
620 *determination of 24-loci MIRU-VNTR profiles from assembled genomes of*  
621 *Mycobacterium tuberculosis*. PeerJ, 2018. **6**: p. e5090.
- 622 25. Aze, J., et al., *Genomics and Machine Learning for Taxonomy Consensus: The*  
623 *Mycobacterium tuberculosis Complex Paradigm*. PLoS One, 2015. **10**(7): p.  
624 e0130912.
- 625 26. Afiahayati, K. Sato, and Y. Sakakibara, *MetaVelvet-SL: an extension of the Velvet*  
626 *assembler to a de novo metagenomic assembler utilizing supervised learning*. DNA  
627 Res, 2015. **22**(1): p. 69-77.

628

## 629 **Supplementary Material**

630 S1\_file : Tables listing the DR, spacer variants and specifically searched patterns in  
631 our pipeline, and tables listing SNPs used to infer classification.

632 S2\_file : Algorithm used to reconstruct CRISPR locus (spacer discovery, and

633 contiguage)

634 S3\_file : Spoligotype and MIRU-VNTR patterns of non-reference assembled  
635 genomes, derived classification and comparison with classification derived from  
636 their SNPs.

637 S4\_file : Selection of reconstructed CRISPRs from short Illumina sequencing runs  
638 using our pipeline.

639 Legend IS6110 sheet. Column A: lineage assignation according to Coll *et al.*,  
640 Palittapongarnpim *et al.* for L1, Shitikov *et al.* for L2, and Stucki *et al.* for L4; column B to  
641 end: the first line designates the name of the gene or the spacer ID; the second title line  
642 designates the spacer ID according to the classical spoligotyping nomenclature also visible by  
643 yellow color). Vertical bars stand for IS6110 copies within DR, in green for copies in  
644 orientation 1 (antisense) and red for orientation 2 (sense). Color boxes are for insertions  
645 within a gene or a spacer, with the same color for the orientation than above. The number in  
646 the box indicates the position (nucleotide) where the insertion occurred in the coding  
647 sequence. Finally, a large colored tube with white squares depicts a very likely recombination  
648 event between two insertion sequences that led to the deletion of all sequences between them  
649 (thus, only one IS6110 remains).

## Dataset #1 =Validation sample

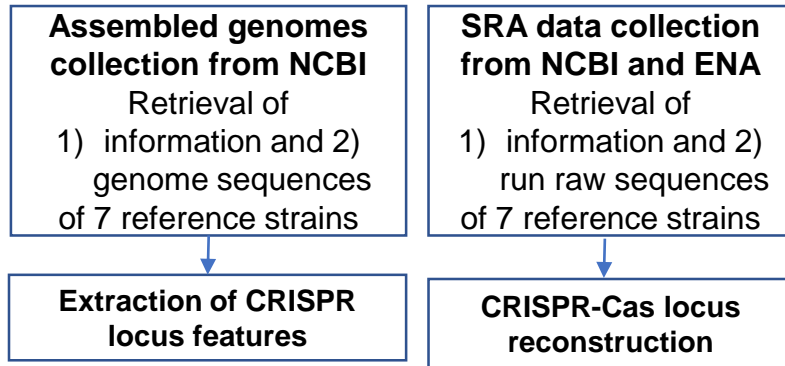

## Dataset #2 =assembled genomes study sample

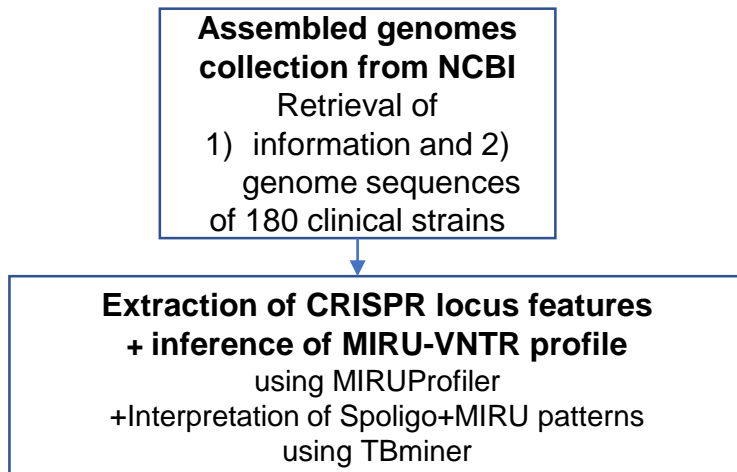

## Dataset #3 = WGS study sample

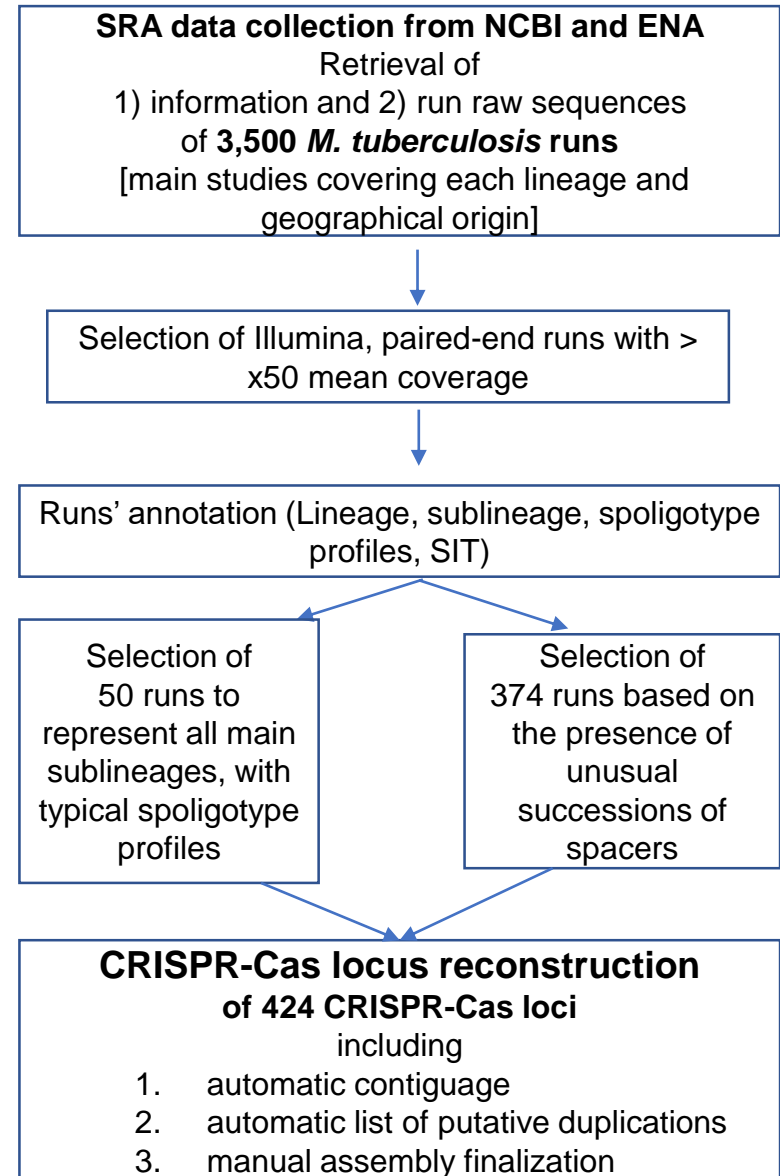



**Table 2 – Spoligotype and MIRU-VNTR profiles of Public assembled genomes with discrepancies between SNP-based and spoligo-derived classification**

| Genome ID       | Lineage/<br>sublineage<br>according to<br>SNPs | Main<br>lineage<br>(according<br>to SNPs) | spoligo-profile                                         | MIRU-Profile           | Main lineage<br>according to<br>spoligo<br>(Pred1_Tblineage) | Lineage<br>&Sublineage<br>according to<br>MIRU-VNTR<br>(Pred2_<br>24VNTR) |
|-----------------|------------------------------------------------|-------------------------------------------|---------------------------------------------------------|------------------------|--------------------------------------------------------------|---------------------------------------------------------------------------|
| EAI5            | 1; 1.1; 1.1.2                                  | L1                                        | ██████████████████████□██████████████████████           | 2241322253422363333252 | L4                                                           | L4_H37Rv                                                                  |
| EAI5_NITR206    | 1; 1.1; 1.1.2                                  | L1                                        | ██□██████████████████████□██████████████████████        | 2241322253422363333252 | L4                                                           | L4_H37Rv                                                                  |
| RGTB423         | 1; 1.2.2                                       | L1                                        | ██████████████████████□██████████□██████████□██████████ | 2?41322253422363?3?52  | L4                                                           | L4_H37Rv                                                                  |
| LN55            | 2; 2.2; 2.2.1                                  | L2                                        | ██████████████████████□██████████████████████           | 2241322253422363333252 | L4                                                           | L4_H37Rv                                                                  |
| MDRMA1565       | 2; 2.2; 2.2.1                                  | L2                                        | ██████████████████████□██████████████████████           | 2241322253422363333252 | L4                                                           | L4_H37Rv                                                                  |
| MDRMA2491       | 2; 2.2; 2.2.1                                  | L2                                        | ██████████████████████□██████████████████████           | 2241322253422363333252 | L4                                                           | L4_H37Rv                                                                  |
| LM060           | 2; 2.2; 2.2.1                                  | L2                                        | ██████████████████████□██████████████████████           | 2241322253422363333252 | L4                                                           | L4_H37Rv                                                                  |
| TBV4768         | 2; 2.2; 2.2.1                                  | L2                                        | ██████████████████████□██████████████████████           | 2241322253422363333252 | L4                                                           | L4_H37Rv                                                                  |
| CV383           | 2; 2.2; 2.2.1                                  | L2                                        | ██████████████████████□██████████████████████           | 2241322253422363333252 | L4                                                           | L4_H37Rv                                                                  |
| Beijing_NITR203 | 2; 2.2; 2.2.1;<br>2.2.1.1                      | L2                                        | ██□□□□██████████████████████□██████████□██████████      | 2241322253422363333252 | L4                                                           | L4_H37Rv                                                                  |
| ZMC13-264       | 2; 2.2; 2.2.2;<br>4.4; 4.4.2                   | L2                                        | ██████████████████████□██████████████████████           | 224132?253422363333252 | L4                                                           | L4_H37Rv                                                                  |
| ZMC13-88        | 2; 2.2; 2.2.1;<br>4.4; 4.4.2                   | L2                                        | ██████████████████████□██████████████████████           | 2241322253422363333252 | L4                                                           | L4_H37Rv                                                                  |
| CA_NITR204      | 3                                              | L3                                        | ██□██████████████████████□██████████□██████████         | 224132225342236333325? | L4                                                           | L4_H37Rv                                                                  |
| H37Rv           | 4; 4.9                                         | L4                                        | ██████████████████████□██████████████████████           | 2241322253422363333252 | L4                                                           | L4_H37Rv                                                                  |
| W-148           | 2; 2.2; 2.2.1                                  | L2                                        | □□□□□□□□□□□□□□□□□□□□□□□□□□□□□□□□                        | 2443335264444257335372 | L2                                                           | L2_Beijing                                                                |

Note that VNTR profiles are almost 100% identical to H37Rv profiles, and that all spoligotype profiles lack the spacers absent in H37Rv, and that most genomes exhibit a typical H37Rv spoligotype profile. This suggests that H37Rv sequences are often borrowed in case of non resolution of the contigs.





**Table 4 – DR and spacer variants for the representative set of MTC diversity**

| Accession  | Lineage according to SNPs | 4*DR*5 | 8*DR11*9 | 14*DR1*15 | 29*DR21*32 | 30*DR2*31 | 44*DR26*45 | 46*DR15*47 | 49*DR27*50 | 50*DR3*51 | 64*DR6*65 | 66*DR4*67 | 67*DR5*68 | sp4_var | sp6_var | sp38_var | sp60_var | sp82_var |
|------------|---------------------------|--------|----------|-----------|------------|-----------|------------|------------|------------|-----------|-----------|-----------|-----------|---------|---------|----------|----------|----------|
| ERR234156  | 1; 1.1; 1.1.1             | □      | □        | ■         | .          | ■         | .          | □          | □          | ■         | □         | ■         | ■         |         |         |          | 1        |          |
| ERR036222  | 1; 1.1; 1.1.3             | □      | .        | .         | .          | ■         | .          | □          | □          | ■         | □         | ■         | ■         |         |         |          |          |          |
| ERR751771  | 1; 1.2.1; 1.2.1.1         | .      | □        | □         | ■          | .         | .          | □          | □          | ■         | □         | ■         | ■         |         |         |          | 1        |          |
| ERR234164  | 1; 1.2.2                  | □      | □        | □         | .          | ■         | .          | □          | □          | ■         | □         | ■         | ■         |         |         |          |          |          |
| SRR1710060 | 2; 2.1                    | □      | □        | □         | .          | ■         | □          | □          | □          | □         | ■         | ■         | ■         |         |         |          |          |          |
| ERR234252  | 2; 2.1                    | .      | .        | .         | .          | .         | □          | □          | □          | □         | ■         | ■         | ■         |         |         |          |          |          |
| ERR551636  | 2; 2.2; 2.2.2             | .      | .        | .         | .          | .         | .          | □          | □          | □         | ■         | ■         | ■         |         |         |          |          |          |
| ERR234109  | 3                         | □      | ■        | .         | .          | ■         | .          | □          | □          | □         | ■         | ■         | ■         |         |         |          |          |          |
| ERR2245388 | 3; 3.1.1                  | □      | □        | .         | .          | .         | .          | .          | □          | □         | ■         | ■         | ■         |         |         |          |          |          |
| ERR234192  | 3; 3.1.2; 3.1.2.1         | □      | □        | .         | .          | ■         | .          | □          | □          | □         | ■         | ■         | ■         |         |         |          |          |          |
| ERR2652972 | 4; 4.1; 4.1.2             | .      | .        | □         | .          | ■         | .          | .          | .          | .         | ■         | ■         | ■         |         |         |          |          |          |
| ERR067645  | 4; 4.2; 4.2.1             | .      | .        | □         | .          | ■         | .          | .          | .          | .         | ■         | ■         | ■         |         |         |          |          |          |
| ERR234258  | 4; 4.3; 4.3.3             | .      | .        | □         | .          | .         | .          | .          | .          | .         | ■         | ■         | ■         |         |         |          |          |          |
| SRR5073887 | 4; 4.4; 4.4.1;<br>4.4.1.1 | .      | .        | □         | .          | ■         | .          | .          | .          | .         | ■         | .         | .         |         |         |          |          |          |
| SRR5073715 | 4; 4.5                    | .      | .        | □         | .          | ■         | .          | .          | .          | .         | ■         | ■         | ■         |         |         |          |          |          |
| ERR551416  | 4; 4.6; 4.6.1;<br>4.6.1.1 | .      | .        | □         | .          | ■         | .          | .          | .          | .         | ■         | .         | ■         |         |         |          |          |          |
| ERR2652992 | 4; 4.7                    | .      | .        | □         | .          | .         | .          | .          | .          | .         | ■         | ■         | ■         |         |         |          |          |          |
| ERR2652941 | 4; 4.9                    | .      | .        | .         | .          | ■         | .          | .          | .          | .         | ■         | ■         | ■         |         |         |          |          |          |
| ERR1971863 | 7                         | ■      | .        | .         | .          | .         | □          | □          | .          | .         | □         | ■         | ■         |         |         |          |          |          |
| ERR751300  | 5                         | □      | □        | □         | .          | ■         | □          | □          | □          | .         | □         | ■         | ■         |         | 2       |          |          |          |
| SRR998631  | 6; BOV_AFRI               | □      | □        | .         | .          | ■         | □          | □          | □          | □         | □         | ■         | #         |         | 1       |          |          |          |
| ERR502499  | <i>M. bovis</i>           | .      | .        | □         | .          | ■         | □          | ■          | .          | □         | .         | .         | .         |         |         |          |          |          |
| ERR1462634 | <i>M. caprae</i>          | .      | .        | .         | .          | ■         | ■          | ■          | ■          | □         | .         | .         | .         |         |         |          |          |          |
| ERR1336822 | <i>M. canettii</i>        | .      | .        | .         | .          | .         | .          | .          | .          | .         | .         | .         | .         |         |         |          |          | 1        |
